# Supplementary material for: University-business-government collaboration: from institutes to platforms and ecosystems
Source: Springer Nature journal article supplement (doi:10.1186/s40604-014-0014-x), 2015-02-19
Supplement: MOESM1 [file 11901848]

## Multilingual abstracts

**University-Business-Government Collaboration: From institutes to platforms and Ecosystems**

Göte S Nyman, Ph.D.

## التعاون بين الجامعة، مجال الأعمال والحكومة: من المعاهد إلى المنصات والنظم الإيكولوجية

### ملخص

يعتمد أنموذج المنصات المتّجهة من القاعدة إلى القمة (UXC) في تحليل التعاون الثلاثي بين الجامعة، مجال الأعمال والحكومة. أخذ بعين الاعتبار المشاكل الحالية و الداخلية للتّحفيظ والمتعلّقة بأنموذج (UXC) خاصّة في أوروبا كما وقع إدماج المبادئ التوجيهية الخاصّة بأنموذج المنصات السريعة لبناء محركات متطوّرة للمعرفة من نوع (UXC). وقعت دراسة بعض التجارب المتعلّقة بالتعاون بين الجامعة، مجال الأعمال والحكومة واستخدامها كدعم معرفي لهذا الأنموذج . ويؤكد المنهج المتّبع قيمة القدرات الأكاديمية التقليدية كعناصر ذاتية للتّنظيم وعوامل لنجاح أنموذج (UXC) .
